# Hot and sour: parasite adaptations to honey bee body temperature and pH

Running title: Thermal and pH niches of bee and mosquito parasites

Evan C Palmer-Young <sup>1\*</sup>, Thomas R Raffel <sup>2</sup>, Jay D Evans <sup>1</sup>

<sup>1</sup> USDA-ARS Bee Research Lab, Beltsville, MD, USA

<sup>2</sup> Department of Biology, Oakland University, Rochester, MI, USA

\*Corresponding author: [eCP52@cornell.edu](mailto:eCP52@cornell.edu)

## 13 **ABSTRACT**

14 Host temperature and gut chemistry can shape resistance to parasite infection. Heat and acidity  
15 can limit trypanosomatid infection in warm-blooded hosts, and could shape infection resistance in  
16 insects as well. The colony-level endothermy and acidic guts of social bees provide unique opportunities  
17 to study how temperature and acidity shape insect-parasite associations. We compared temperature  
18 and pH tolerance between three trypanosomatid parasites from social bees and a related  
19 trypanosomatid from poikilothermic mosquitoes, which have alkaline guts.

20 Relative to the mosquito parasites, all three bee parasites had higher heat tolerance that  
21 reflected levels of endothermy in hosts. Heat tolerance of the honey bee parasite *Crithidia mellificae*  
22 was exceptional for its genus, implicating honey bee endothermy as a filter of parasite establishment.  
23 The lesser heat tolerance of the emerging *Lotmaria passim* suggests possible spillover from a less  
24 endothermic host. Whereas both honey bee parasites tolerated the acidic pH's found in bee intestines,  
25 mosquito parasites tolerated the alkaline conditions found in mosquito midguts, suggesting that both  
26 gut pH and temperature could structure host-parasite specificity. Elucidating how host temperature and  
27 gut pH affect infection—and corresponding parasite adaptations to these factors—could help explain  
28 trypanosomatids' distribution among insects and invasion of mammals.

29 **Keywords:** thermal performance curve, metabolic theory of ecology, infectious disease ecology,  
30 thermoregulation, *Apis mellifera*, *Leishmania*

## 31 INTRODUCTION

32 Infection by parasites depends on their ability to survive and proliferate under the conditions  
33 found in their hosts [1]. Two defining characteristics of this environment are temperature and pH. Host  
34 body temperature can profoundly affect host-parasite interactions [2]. In particular, elevated host body  
35 temperature due to physiological or behavioral fever limits parasite growth and reduces infection-  
36 related morbidity in diverse animals, including insects [3–5]. pH is another driver of microbial  
37 establishment [6]. Gut pH contributes to sterilization of food and limits proliferation of opportunistic  
38 pathogens [7,8], shaping species-specific resistance to parasites in the insect gut [9]. Knowledge of how  
39 host temperature and pH affect host specificity of insect parasites could help to identify host niches and  
40 parasite adaptations that affect infection of beneficial insects and potential for insect-vectored, zoonotic  
41 spillover to warm-blooded mammals.

42 The trypanosomatid gut parasites of insects infect a diverse range of hosts—comprising a variety  
43 of thermal niches and gut physiologies—with apparently loose host-parasite specificity that remains  
44 incompletely understood [10]. The invasion of mammals by a subset of these insect-associated species—  
45 the *Leishmania* and *Trypanosoma*—is thought to be limited by mammals’ high body temperatures [11],  
46 which can confine infections to (cooler) peripheral body sites even in established mammalian pathogens  
47 [12]. In *Leishmania*, where the mammalian stage is intracellular, the low pH of the phagocyte lysosome  
48 poses an additional barrier to infection [12]. Nevertheless, putatively monoxenous (i.e., insect-  
49 restricted) parasites in the Leishmaniinae sub-family occasionally infect humans [13,14]; such candidate  
50 dixenous (i.e., two-host) strains were found in retrospect to be heat-tolerant [13,15]. If temperature  
51 and pH limit the establishment of insect trypanosomatids in mammals, these same factors—which vary  
52 widely across insect geographic ranges and nutritional niches [16]—could affect the host specificity of  
53 parasites among insects as well.

54           The social honey and bumble bees offer unique opportunities to study parallel adaptations of  
55 trypanosomatids to high temperature and low pH in monoxenous trypanosomatids. Whereas most  
56 solitary insects have a small body size and limited ability to thermoregulate, social bees inhabit large,  
57 thermoregulated colonies with temperatures resembling those of warm-blooded mammals [17,18].  
58 Such high temperatures increase resistance to other pathogens [19,20], and could limit infection by  
59 heat-intolerant trypanosomatids as well. Second, bee diets consist of sugar-rich nectar and  
60 polysaccharide-rich pollen, which are fermented to organic acids by characteristic gut symbionts that  
61 maintain an acidic pH in the honey bee hindgut and rectum [21,22]. This contrasts with the guts of  
62 hematophagous Dipteran insects—including mosquitoes—which obtain nitrogen from low-  
63 polysaccharide animal blood and have near-neutral to alkaline gut environments [23–25].

64           To test whether host thermoregulation and diet-associated gut pH can function as filters of  
65 trypanosomatid infection in insects, we compared the effects of temperature and pH on growth of  
66 phylogenetically related hindgut parasites from honey bees (*Crithidia mellifica*e and *Lotmaria passim*),  
67 bumble bees (four strains of *Crithidia bombi*, using previously published data [26,27]), and mosquitoes  
68 (two strains of *Crithidia fasciculata* [28]). The two major honey bee trypanosomatids—*C. mellifica*e [29]  
69 and the emerging parasite *Lotmaria passim*, both in the Leishmaniinae [30]—have a global distribution,  
70 can reach >90% prevalence in managed colonies, and have been associated with colony collapse on  
71 three continents [31–35]. Both species—as well as the bumble parasite *C. bombi* [36]—establish in the  
72 hindgut and rectum, the most acidic regions of the intestine [21,37]. Based on the thermal strategies of  
73 their host species, we predicted that parasites of highly endothermic honey bees would have greater  
74 heat tolerance than parasites from mosquitoes, with intermediate heat tolerance in parasites of bumble  
75 bees—which thermoregulate their nests at lower temperatures than do honey bees [38]. We also  
76 predicted that parasites of pollen-eating bees would have greater tolerance to acidity than would  
77 parasites of blood-consuming mosquitoes, reflecting differences in the diets and gut pH's of their hosts.

## 78 **MATERIALS AND METHODS**

### 79 **Cell Cultures**

80 *Crithidia mellifica* (ATCC 30254 [29]), *L. passim* (strain BRL [30]) and *C. fasciculata* strains  
81 “CFC1” [39] and “Wallace” (ATCC 12857) were obtained from the American Type Culture Collection and  
82 collaborators. Honey bee parasites were grown in ‘FPFB’ medium including 10% heat-inactivated fetal  
83 bovine serum (pH 5.9-6.0 [40]). Mosquito parasites were grown in brain-heart infusion broth with 20  
84 ug/mL hemin (pH 7.4). All parasites were incubated at 20 °C in vented cell culture flasks and transferred  
85 to fresh media every 2 d.

### 86 **Temperature experiments**

87 Parasite growth rates were measured by optical density (OD<sub>600</sub>) at temperatures between 20  
88 and 41°C (intervals of 2°C between 23°C and 31°C) on a temperature-controlled microplate reader with  
89 0.1°C resolution (Biotek ‘Synergy’ H1). Cultures were diluted in fresh media to a net OD of 0.040 and  
90 aliquoted to 96-well plates containing 120 µL media per well. Measurements were taken every 5 min  
91 for 24 h, with 30 s shaking before each read. Each single-temperature block consisted of one 96-well  
92 plate with 15 wells (treated as technical replicates) of each of the four parasite strains and 6 cell-free  
93 control wells—containing an equal volume of media without parasites—to control for growth-  
94 independent changes in OD during incubation. At least two full blocks were conducted at each  
95 temperature, to avoid confounding the effects of experimental block and temperature treatment.

### 96 **pH experiments**

97 Parasite growth rates were measured between pH 2.1 and 11.3. Aliquots of the base medium  
98 for each parasite were first acidified and alkalized to extreme pH levels that inhibited growth in  
99 preliminary trials. Treatments were prepared by combining acidified and alkalized media in varying  
100 proportions to generate 12 treatments spanning a broad pH range. To initiate the assay, a 12x

101 suspension of cultured cells was added to each treatment for a starting OD of 0.020 in a volume of 120  
102  $\mu$ L. Each experimental block contained one well per strain plus two cell-free controls of each pH  
103 treatment. Growth rates were measured at 29°C for 24 h at 5 min intervals using a microplate reader.  
104 Final pH (after addition of fresh media to 1/12 of the final volume) was measured for each treatment  
105 using a pH electrode, calibrated immediately prior to measurement. The entire experiment was  
106 performed twice, with a slightly narrower pH range in the second block to obtain more complete pH  
107 performance curves.

## 108 Comparisons with previous results

109 To compare thermal performance curves of honey bee parasites and their hosts, we used data  
110 for the temperature dependence of force generation during honey bee flight [41] (**Supplementary Fig.**  
111 **1**). For comparison to parasites from hosts with intermediate levels of thermoregulation, we used  
112 previously published data for thermal performance of four strains of the bumble bee parasite *C. bombi*.  
113 For these datasets, growth rates of four strains were measured across temperatures from 17 to 42°C  
114 [26], and growth rates of one strain were measured across pH values from 5.0 to 6.2 [27]  
115 (**Supplementary Fig. 2**).

## 116 Statistical Analysis

117 Analyses were conducted using R for Windows v4.0.3 [42]. Models were fit using package “rTPC”  
118 [43]. Figures were made with packages “ggplot2” and “cowplot” [44,45]

119 **Growth rates.** Net OD was calculated by subtracting the average OD from cell-free controls of  
120 the corresponding media, treatment, and time point. Growth rates for each well were calculated as the  
121 maximum slope of the curve of  $\ln(\text{OD})$  vs. time, obtained by fitting a rolling linear regression to each 4 h  
122 window of the growth curve [46]. The first 2 h of each run were excluded to allow OD readings to  
123 stabilize. We used only slopes with  $r^2$  values of  $>0.95$  and  $>0.90$  for the temperature and pH

124 experiments, respectively, and assigned a growth rate of zero to samples where the average slope of the  
125 growth curve was negative. For temperature experiments, we used the median growth rate among the  
126 15 replicates within each block, to avoid pseudoreplication within each implementation of the  
127 temperature treatment [47].

128 **Temperature models.** We modeled the temperature dependence of growth for each  
129 trypanosomatid strain using a Sharpe-Schoolfield equation modified for high temperatures [46,48,49].

$$130 \quad \text{rate} = \frac{r_{T_{ref}} \cdot e^{-\frac{E}{k} \left( \frac{1}{T} - \frac{1}{T_{ref}} \right)}}{1 + e^{\frac{E_h}{k} \left( \frac{1}{T_h} - \frac{1}{T} \right)}} \quad (1)$$

131 In Equation (1), *rate* refers to the maximum specific growth rate (in h<sup>-1</sup>); *r*<sub>*T*<sub>ref</sub></sub> is the growth rate  
132 (in h<sup>-1</sup>) at an arbitrary calibration temperature *T*<sub>*ref*</sub> (fixed at 20°C); *E* is the activation energy (in eV), which  
133 primarily affects the upward slope of the thermal performance curve (i.e., sensitivity of growth to  
134 temperature) at suboptimal temperatures; *k* is Boltmann's constant (8.62·10<sup>-5</sup> eV·K<sup>-1</sup>); *E*<sub>*h*</sub> is the  
135 deactivation energy (in eV), which determines how rapidly the thermal performance curve decreases at  
136 temperatures above *T*<sub>*p*<sub>h</sub></sub>; *T*<sub>*h*</sub> is the high temperature (in K) at which growth rate is reduced by 50%  
137 (relative to the value predicted by the Arrhenius equation—which assumes a monotonic, temperature-  
138 dependent increase) [49]; and *T* is the experimental incubation temperature (in K).

139 **pH models.** To describe the effects of pH on growth rates, we used a biphasic logistic model that  
140 describes sigmoidal decreases in growth rate at low and high pH.

$$141 \quad \text{rate} = \frac{r_{max}}{1 + e^{-E_L \left( \frac{1}{pH_L} - \frac{1}{pH} \right)} + e^{E_h \left( \frac{1}{pH_h} - \frac{1}{pH} \right)}} \quad (2)$$

142 In Equation (2), *r*<sub>*max*</sub> is the specific growth rate at the optimum pH; *E*<sub>*L*</sub> and *E*<sub>*h*</sub> correspond to the  
143 rates of deactivation at low and high pH, respectively; and *pH*<sub>*L*</sub> and *pH*<sub>*h*</sub> represent the pH values at which  
144 growth rate is reduced by 50% relative to *r*<sub>*max*</sub>. Due to absence of high-pH measurements for *C. bombi*,

145 models for this species were fit using a standard (monophasic) logistic regression, which omitted the  
146 second term of the denominator in Equation (2).

147 Models were optimized using nonlinear least squares, implemented with R packages rTPC and  
148 nls.mulstart [43]. Confidence intervals on parameter values and predicted growth rates were obtained  
149 by bootstrap resampling of the residuals (10,000 model iterations) [50]. We also used the bootstrap  
150 model predictions to estimate the following traits: temperatures of peak growth rate ( $T_{pk}$ ) and 50%  
151 inhibition relative to the peak value ( $IT_{50}$ ); pH of peak growth ( $pH_{pk}$ ); and pH niche breadth (i.e., the  
152 number of pH units between  $pH_L$  and  $pH_h$ ). The 0.025 and 0.975 quantiles for parameter estimates,  
153 predicted growth rates at each temperature, and traits derived from bootstrap predictions were used to  
154 define 95% confidence intervals. Strains were considered significantly different from each other when  
155 their 95% confidence intervals did not overlap.

## 156 **RESULTS**

### 157 **Temperature experiments**

158 Thermal performance curves ([Fig. 1](#)) and model parameters ([Fig. 2](#)) showed higher heat  
159 tolerance in the two honey bee parasites than in the mosquito parasites. *Crithidia mellifica* (peak ( $T_{pk}$ ):  
160 35.42°C, 50% inhibition ( $IT_{50}$ ): 38.7°C) grew well throughout the temperature range found in honey bee  
161 hives during brood-rearing (33.8-37°C [18]) and exhibited the peak growth temperature closest to that  
162 of *A. mellifera* (38.4°C [41]; **Supplementary Fig. 1**). The heat tolerance of *L. passim* ( $T_{pk}$ : 33.47°C,  $IT_{50}$ :  
163 36.97°C) was approximately 2°C less than that of *C. mellifica*, with predicted growth rates reduced by  
164 >50% at the upper end of the thermal range found in colonies ([Fig. 1](#)). Thermal performance curves and  
165 parameter estimates were similar for the two strains of *C. fasciculata*, where temperatures of peak  
166 growth (strain CFC1: 30.92°C, strain Wallace: 31.58°C) and 50% inhibition (CFC1: 35.27°C, Wallace:  
167 35.48°C) were approximately 2°C lower than for *L. passim* and 4°C lower than for *C. mellifica* ([Fig. 2](#)).



168 Nevertheless, both strains had peak growth temperatures ( $T_{pk}$ ) that exceeded the mean  $T_{pk}$  for a variety  
169 of traits in diverse mosquito species (28.4°C [51], [Fig. 2](#)).

170 Thermal performance curves of *C. bombi* from bumble bees ( $T_{pk}$ : 33.67°C;  $IT_{50}$ : 37.90°C, [Fig. 2](#),  
171 **Supplementary Fig. 2**) most resembled that of *L. passim*. Although the coarser 5°C temperature interval  
172 for the published *C. bombi* data resulted in higher uncertainty, all four strains of this species appeared to  
173 have at least 2°C higher inhibitory temperatures ( $IT_{50}$ ) than did *C. fasciculata* (**Fig. 2**). Activation energies  
174 ( $E$ ) ranged from 0.39 eV (*C. mellifica*) to 0.52 eV (*C. fasciculata* strain Wallace), well within the range  
175 observed across a diversity of physiological and ecological rates (median 0.55 eV [52], **Supplementary**  
176 **Fig. 3**). High-temperature deactivation energies ( $E_h$ ) ranged from 5.18 eV (*C. fasciculata* Wallace) to 8.29  
177 eV (*C. mellifica*), consistent with the steep decline at high temperatures that is typical of thermal  
178 performance curves [52] (**Supplementary Fig. 3**).

## 179 pH experiments

180 We observed the greatest tolerance to acidity in the two parasites of honey bees, each of which  
181 grew at nearly two units' lower pH than either *C. fasciculata* or the previously tested *C. bombi*. Both  
182 maintained strong growth at the pH of the honey bee rectum (pH 5.2 [21] ([Fig. 3](#))). *Crithidia mellifica*  
183 had the broadest pH niche, with the greatest tolerance of both acidity (50% low-pH inhibition ( $pH_L$ ):  
184 3.07, 95% CI: 2.97-3.25) and alkalinity (50% high-pH inhibition ( $pH_H$ ): 9.93, CI: 9.55-10.21, [Fig. 4](#)).  
185 *Lotmaria passim* was nearly as tolerant of acidity as was *C. mellifica* ( $pH_L$ : 3.44, CI: 3.35-3.53) but grew  
186 weakly above pH 7 ( $pH_H$ : 7.33, CI: 7.24-7.43), with peak growth pH (5.57, CI: 5.20-5.76) closely matched  
187 to that of the host rectum (**Fig.'s 3-4**).

188 In contrast, both strains of *C. fasciculata* grew fastest at neutral to weakly basic pH ( $pH_{pk}$  for  
189 CFC1: estimate 7.58, CI: 6.90-8.10; Wallace: estimate 7.42, CI: 7.05-7.73, **Fig.'s 3-4**). Although tolerance  
190 of acidity was not as great as in the honey bee parasites ( $pH_L$  for CFC1: 5.01, CI: 4.71-5.24; Wallace: 5.08,

191 CI: 4.86-5.39), the two strains were tolerant of alkaline conditions ( $pH_h$  for CFC1: 9.62, CI: 9.39-9.84;  
192 Wallace: 9.24, CI: 9.01-9.47) that approached those found in the midgut of their host *Culex pipiens* [25]  
193 (Fig.'s 3-4). Acidity tolerance in *C. bombi* ( $pH_L$  5.18, CI: 5.17-5.19) was indistinguishable from that of *C.*  
194 *fasciculata* (Fig. 4; see **Supplementary Fig. 4** for full *C. bombi* curves). *Crithidia bombi* was also notable  
195 for its steep decline in growth rate between pH 6 and pH 5 [27], which was reflected in an estimate for  
196 deactivation energy (parameter  $E_i$ ) more than 6-fold higher than that of the strains tested here  
197 (**Supplementary Fig. 5**).

## 198 **DISCUSSION**

199 Our results indicate the importance of colony-scale endothermy in social bees as a filter for gut  
200 parasites. All the parasites from endothermic social bees showed greater heat tolerance than did  
201 parasites from mosquitoes. This was particularly notable for *C. mellificae*, which exhibited superior heat  
202 tolerance to all previously studied, poikilothermic tropical insect-associated trypanosomatids noted for  
203 their heat tolerance. For example, growth of *Crithidia luciliae thermophila* (since renamed *C. thermophila*  
204 [53]), *Crithidia hutneri* [54], and *Leptomonas pessoai* (renamed *Herpetomonas samuelpeessoai* [55,56]) all  
205 grew faster at 28°C than at 37°C. Growth of *Leptomonas seymouri*—which occasionally infects humans  
206 [14]—was likewise poor at 37°C [57]. In contrast, growth of our *C. mellificae* was approximately 30%  
207 faster at 37°C than at 28°C. Such heat tolerance was suggested by Cosgrove and Mcghee [58], whose  
208 review stated that an unnamed trypanosomatid from *Vespula squamosa* (presumably ATCC strain 30862  
209 of *C. mellificae*) grew in avian embryos at 37°C with no prior acclimation. However, the relevant  
210 reference [59] did not mention *C. mellificae*. Of note, the species that was shown to maintain strong  
211 growth in embryos at 37° was *Crithidia acanthocephali* [60]. Although originally isolated from a  
212 Hemipteran [60], sequences matching this species were recently amplified from honey bees in Spain  
213 [61]; the parasite's heat tolerance could facilitate its survival in bees.

214           The warm-blooded mammal-like temperatures of a breeding honey bee colony [18] likely  
215 preclude infection by trypanosomatids with low heat tolerance, and could exert positive selection for  
216 heat tolerance within parasite lineages. For parasites that do establish in colonies, our results suggest  
217 that high colony temperatures might reduce infection intensities. Even growth of the most heat-tolerant  
218 parasite (*C. mellificae*) peaked at a lower temperature than did flight performance of honey bee hosts  
219 (38.4°C, [Fig. 1](#)). Peak performance temperatures of flight muscle [62] and respiration [63] in bumble  
220 bees are also high (>40°C). This suggests that increases in temperature could favor increases in host  
221 metabolic performance—perhaps including immune function—while inhibiting parasite growth. Honey  
222 and bumble bee gut symbionts—which enhance resistance to *C. bombi* [64]—are likewise heat-tolerant.  
223 Honey bee symbionts have standard culturing temperatures of 35-37°C [65], can grow at temperatures  
224 up to 44°C [66], and tolerate hour-long heat shock at 52°C [66]. A *Lactobacillus* species from bumble  
225 bees was similarly thermophilic, with a peak growth temperature of approximately 40°C [26]. High  
226 temperatures could therefore enhance the antiparasitic activities of these symbionts as well as  
227 performance of the bee immune system [27], harnessing the bees’ socially enabled thermoregulation  
228 and core gut microbiota for defense against infection.

229           Our results suggest that maintenance of high, ‘social fever’-like colony temperatures would be  
230 particularly effective against the relatively heat-susceptible *L. passim* and *C. bombi*. Growth rates of *L.*  
231 *passim* dropped by approximately 50% over the 3.2°C range found in brood-rearing honey bee colonies  
232 ([Fig. 1](#)). Similarly, infection of *C. bombi* was 81% lower at 37°C than at 21° [67]. Inoculations of honey  
233 bees with *C. mellificae* were likewise less successful at 35°C than at 29°C (albeit in separate experiments  
234 [29]). Our results also suggest that bees may become increasingly susceptible to infection as they  
235 transition from activities at the well-heated colony core to the cooler and more variable periphery, or to  
236 foraging outside (at age 10-25 d [68]). Observations of experimentally infected, colony-reared bees—  
237 which showed a 10-fold increase in parasite mRNA between ages 7 and 27 d [69]—are consistent with

238 these predictions. However, similar age-related infection dynamics were observed in caged bees at  
239 constant temperatures [69], suggesting that other age-related factors could also contribute to this  
240 pattern.

241 Honey bee trypanosomatid infection intensities are inversely related to temperature in field  
242 colonies as well [70]. In managed US colonies, *L. passim* infection intensity (originally described as *C.*  
243 *mellifica* [30,71]) peaked in mid-winter, when colony core temperatures average 14°C lower than in  
244 summer [18]. Such temperature-dependent infection dynamics could explain the associations between  
245 trypanosomatid infection and overwinter colony collapse [32]. Seasonal susceptibility of colonies to  
246 infection could be exacerbated by landscape, chemical, and nutritional factors that impair  
247 thermoregulation [72,73]. For example, colonies from agricultural areas had average winter  
248 temperatures 8°C lower than did colonies from grasslands [74], highlighting how land use changes could  
249 affect temperature-mediated resistance to an emerging infectious disease.

250 *Lotmaria passim*'s low heat tolerance relative to *C. mellifica*, susceptibility to the high  
251 temperatures found in honey bee colonies, and apparently recent global emergence in *A. mellifera* [30]  
252 all invite speculation of a recent host shift from a less endothermic bee species. The Asian honey bees  
253 *Apis cerana* [75] and *A. dorsata* [76] have ~2°C lower brood temperature optima relative to *A. mellifera*  
254 [18]—matching the ~2°C difference in optimal and inhibitory temperatures between *C. mellifica* and *L.*  
255 *passim*. *Apis cerana* harbored an *L. passim* haplotype basal to the strains found on other continents [77],  
256 providing circumstantial phylogenetic evidence for an Asian parasite origin. Such a host shift could  
257 parallel the worldwide dispersal of the now ubiquitous microsporidian *Nosema ceranae* from *A. cerana*  
258 [78].

259 Our findings of acid tolerance in parasites of honey bees and alkaline tolerance in parasites of  
260 mosquitoes suggest that gut pH—itsself a reflection of diet, digestive physiology, and microbiota—is also

261 an important driver of host specificity in trypanosomatid parasites of insects. The tolerance of acidic  
262 conditions shown by honey bee parasites—and the low optimum pH of the emerging parasite *L.*  
263 *passim*—reflect the typically acidic pH found in the honey bee rectum where these parasites establish  
264 [21,29,30]. This tolerance of acidity was noted by Langridge and McGhee in their isolations of *C.*  
265 *mellificae* [29]. The honey bee's low gut pH results from fermentation of pollen polysaccharides by the  
266 characteristic bee gut microbiota [21,22]. In humans, acidic intestinal and fecal pH's likewise reflect the  
267 intake and subsequent fermentation of dietary polysaccharides [79], with consequences for microbiome  
268 composition and growth of opportunistic pathogens [7,80]. The pH of the bee rectum—which at pH 5.2  
269 is over a full pH unit more acidic than the already pathogen-inhibiting feces of humans consuming fiber-  
270 rich vegan diets (pH 6.3 [80])—may likewise provide protection against opportunistic invaders including  
271 non-specialist trypanosomatids.

272           Although standard trypanosomatid culture media is neutral to weakly basic (e.g., brain heart  
273 infusion broth, pH 7.4), enhancement of growth under acidic conditions has been reported before. For  
274 example, growth of *H. samuelpeessoai* occurred between pH 4 and pH 9 [56]. In addition to *C.*  
275 *mellificae*—described as 'acidophilic', with optimum growth at pH 5 [29]—McGhee described enhanced  
276 growth under acidic conditions (pH 5 vs. pH 8) in three additional trypanosomatids and found growth  
277 exclusively at low pH in two others [81]. All these acidophilic species were isolated from hemipteran  
278 hosts; two were from the giant milkweed bug *Oncopeltus fasciatus*, whose gut pH (4.6-5.4 [82])  
279 resembles that of honey bees— suggesting potential for bee-hemipteran parasite exchange.

280           In contrast—and concordant with our results—the parasite species that thrived under basic  
281 conditions (including *C. fasciculata*) were from Dipterans [81], where gut pH is typically extremely  
282 alkaline. For example, the original host of our *C. fasciculata* (*Culex pipiens*) has a midgut pH greater than  
283 10 in larvae [25]—yet this life stage can still be infected by *C. fasciculata* [28]. Similarly high pH's occur in

284 the larval guts of other Diptera (e.g., midgut pH of 11 in Bibionid larvae [24]. In mosquito adults, the  
285 midgut is near pH 6 in sugar-fed adults [83], but is alkalinized to pH 8.5-9.5 following ingestion of blood  
286 [23]. Adaptations to these conditions are reflected in our results, with both *C. fasciculata* strains growing  
287 fastest near neutral pH (6-8) and remaining viable up to pH 10 (**Fig. 3**), consistent with previous  
288 characterizations [84]. Intriguingly, the difference in pH optima between the honey bee parasite *L.*  
289 *passim* and the mosquito parasite *C. fasciculata* matched almost exactly the differences between the  
290 optima for the mammalian tissue (amastigote, pH 5.5) and insect (promastigote, pH 7-7.5) stages of  
291 *Leishmania* [12]. This raises the question of whether differences in pH tolerance among species of  
292 monoxenous taxa and between life stages of dixenous taxa can be explained by similar mechanisms, and  
293 whether tolerance of acidity is correlated with tolerance of high temperature (as in *Leishmania* [12]).

294 Contrary to predictions, the bumble bee parasite *C. bombi* did not exhibit the high tolerance of  
295 acidity found in the honey bee parasites. The single report of bumble bee gut hindgut pH that we could  
296 locate (pH 6.25 from *Bombus fervidus* [16]) is substantially higher than the pH <5.2 measured in honey  
297 bees [21,37], but a close match to the pH 6.0-6.2 that yields optimal growth of *C. bombi* (**Supplementary**  
298 **Fig. 4**, [27]). Although honey and bumble bees have similar pollen- and nectar-based diets and gut  
299 microbial communities [85]—which might be expected to result in similar gut pH—they exhibit marked  
300 differences in physiology and behavior. Bumble bees have a more rapid intestinal transit time than do  
301 honey bees [86], leaving less time for acid-generating fermentation. In contrast, honey bees not only  
302 have slower baseline transit times, but also fastidiously refrain from defecation in the colony—a  
303 behavior not exhibited by bumble bees [87]. As honey bees spend the first 10-25 d in the colony before  
304 they forage outdoors [68], the pollen-rich rectal contents have considerable time to acidify. During the  
305 winter, honey bees commonly retain rectal contents for several months while confined in the colony  
306 [88]. Meanwhile, they continue to ingest pollen, with their distended guts exhibiting increases in

307 populations of fermentative hindgut bacteria [89]. We hypothesize that these behaviors result in lower  
308 gut pH—and greater selection on parasites for tolerance of acidity—in honey bees than in bumble bees.

309         The same heat tolerance that allows insect trypanosomatids to infect endothermic bees could  
310 also pre-adapt parasites for infection of warm-blooded mammals. Several supposedly monoxenous  
311 species have been found in humans—often together with the expected *Leishmania* [13,14,58]—and  
312 proven infectious in the glands of opossums and the skin and organs of mice [13,90], demonstrating the  
313 ability to proliferate at 37°C. Intriguingly, trypanosomatids with 100% GAPDH sequence identity to *C.*  
314 *mellificae* were recently isolated from the blood of numerous wild mammals in Brazil [91,92]. The  
315 viability of these parasites at 37°C [92]—consistent with our findings—would permit survival in the  
316 mammalian bloodstream, perhaps additionally aided by parasite acclimation to high temperatures in  
317 honey bee colonies. Given that *L. seymouri*—one of the closest known relatives of *C. mellificae* [30]—  
318 occasionally infects humans [14] despite minimal growth at 37°C [57], corresponding infection of  
319 mammals by *C. mellificae* seems plausible. Although pathways of transmission remain unclear, we have  
320 shown that *C. mellificae* from honey bees can proliferate in bees of other families—including halictids,  
321 which are attracted to mammalian perspiration [93]. The impressive range of pH tolerance shown here  
322 could also support its survival in other, possibly hematophagous hosts with diverse gut physiologies.

## 323 **CONCLUSIONS**

324         Our interspecific comparisons—including the first tests of temperature and pH tolerance in the  
325 emerging parasite *L. passim*—implicate colony-level endothermy and diet- and microbiome-related  
326 changes in gut acidity as drivers of host specificity in insect trypanosomatids. Our results also provide a  
327 mechanistic explanation for the relative resistance of honey bees to trypanosomatids from other insects  
328 [94] and the recent findings of *C. mellificae*—a presumed monoxenous parasite—in a variety of warm-  
329 blooded mammals [91,92]. Escape from parasites could be one factor that favors the evolution of

330 energetically costly social endothermy and maintenance of gut symbiont communities in insects,  
331 providing infection-related benefits that parallel those found in homeothermic vertebrates while  
332 exerting parallel selective pressures on parasites.

## 333 **ACKNOWLEDGMENTS**

334 We thank the ATCC, Michael and Megan Povelones, Stephen Beverley, Ryan Schwarz, and Ben  
335 Sadd for parasite strains and culturing advice; Daniel Padfield for R scripts; and anonymous reviewers for  
336 their service in improving the manuscript.

## 337 **FUNDING**

338 This project was funded by the USDA Agricultural Research Service; a USDA-NIFA Pollinator  
339 Health grant to JDE; a North American Pollinator Protection Campaign Honey Bee Health Improvement  
340 Project Grant and an Eva Crane Trust Grant to ECPY and JDE; and an NSF-CAREER grant (IOS 1651888) to  
341 TRR. Funders had no role in study design, data collection and interpretation, or publication.

## 342 **CONFLICTS OF INTEREST**

343 The authors declare that they have no conflicts of interest.

## 344 **DATA AVAILABILITY**

345 All data are supplied in the Supplementary Information, Data S1.

## 346 **AUTHORS' CONTRIBUTIONS**

347 ECPY conceived the study. ECPY and TRR designed experiments. ECPY conducted experiments,  
348 analyzed data, and drafted the manuscript with guidance from JDE and JDE. All authors revised the  
349 manuscript and gave approval for publication.



## 350 REFERENCES

- 351 1. Adamson ML, Caira JN. 1994 Evolutionary factors influencing the nature of parasite specificity.  
352 *Parasitology* **109**, S85–S95. (doi:10.1017/S0031182000085103)
- 353 2. Kirk D, Jones N, Peacock S, Phillips J, Molnár PK, Krkošek M, Luijckx P. 2018 Empirical evidence that  
354 metabolic theory describes the temperature dependency of within-host parasite dynamics. *PLOS*  
355 *Biol.* **16**, e2004608. (doi:10.1371/journal.pbio.2004608)
- 356 3. Boorstein SM, Ewald PW. 1987 Costs and benefits of behavioral fever in *Melanoplus sanguinipes*  
357 infected by *Nosema acridophagus*. *Physiol. Zool.* **60**, 586–595.
- 358 4. Kluger MJ, Kozak W, Conn CA, Leon LR, Soszynski D. 1998 Role of Fever in Disease. *Ann. N. Y. Acad.*  
359 *Sci.* **856**, 224–233. (doi:10.1111/j.1749-6632.1998.tb08329.x)
- 360 5. Stahlschmidt ZR, Adamo SA. 2013 Context dependency and generality of fever in insects.  
361 *Naturwissenschaften* **100**, 691–696. (doi:10.1007/s00114-013-1057-y)
- 362 6. Kuczynski J, Liu Z, Lozupone C, McDonald D, Fierer N, Knight R. 2010 Microbial community  
363 resemblance methods differ in their ability to detect biologically relevant patterns. *Nat. Methods* **7**,  
364 813.
- 365 7. Ilhan ZE, Marcus AK, Kang D-W, Rittmann BE, Krajmalnik-Brown R. 2017 pH-Mediated Microbial and  
366 Metabolic Interactions in Fecal Enrichment Cultures. *mSphere* **2**. (doi:10.1128/mSphere.00047-17)
- 367 8. Sung J, Kim N, Lee J, Hwang Y-J, Kim HW, Chung JW, Kim J-W, Lee DH. 2018 Associations among  
368 Gastric Juice pH, Atrophic Gastritis, Intestinal Metaplasia and Helicobacter pylori Infection. *Gut Liver*  
369 **12**, 158–164. (doi:10.5009/gnl17063)
- 370 9. Wilson GR, Benoit TG. 1993 Alkaline pH Activates Bacillus thuringiensis Spores. *J. Invertebr. Pathol.*  
371 **62**, 87–89. (doi:10.1006/jipa.1993.1079)
- 372 10. Maslov DA, Votýpka J, Yurchenko V, Lukeš J. 2013 Diversity and phylogeny of insect  
373 trypanosomatids: all that is hidden shall be revealed. *Trends Parasitol.* **29**, 43–52.  
374 (doi:10.1016/j.pt.2012.11.001)
- 375 11. Lukeš J, Skalický T, Týč J, Votýpka J, Yurchenko V. 2014 Evolution of parasitism in kinetoplastid  
376 flagellates. *Mol. Biochem. Parasitol.* **195**, 115–122. (doi:10.1016/j.molbiopara.2014.05.007)
- 377 12. Zilberstein D, Shapira M. 1994 THE ROLE OF pH AND TEMPERATURE IN THE DEVELOPMENT OF  
378 LEISHMANIA PARASITES. *Annu. Rev. Microbiol.* **48**, 449–470.  
379 (doi:10.1146/annurev.mi.48.100194.002313)
- 380 13. Maruyama SR *et al.* 2019 Non-Leishmania Parasite in Fatal Visceral Leishmaniasis–Like Disease,  
381 Brazil. *Emerg. Infect. Dis.* **25**, 2088–2092. (doi:10.3201/eid2511.181548)
- 382 14. Kaufer A, Ellis J, Stark D, Barratt J. 2017 The evolution of trypanosomatid taxonomy. *Parasit. Vectors*  
383 **10**, 1–17. (doi:10.1186/s13071-017-2204-7)

- 384 15. Kraeva N *et al.* 2015 *Leptomonas seymouri*: Adaptations to the Dixenous Life Cycle Analyzed by  
385 Genome Sequencing, Transcriptome Profiling and Co-infection with *Leishmania donovani*. *PLOS*  
386 *Pathog.* **11**, e1005127. (doi:10.1371/journal.ppat.1005127)
- 387 16. Swingle MC. 1931 Hydrogen Ion Concentration within the Digestive Tract of Certain Insects. \*. *Ann.*  
388 *Entomol. Soc. Am.* **24**, 489–495. (doi:10.1093/aesa/24.3.489)
- 389 17. Heinrich B. 1972 Patterns of endothermy in bumblebee queens, drones and workers. *J. Comp.*  
390 *Physiol.* **77**, 65–79. (doi:10.1007/BF00696520)
- 391 18. Fahrenholz L, Lamprecht I, Schricker B. 1989 Thermal investigations of a honey bee colony:  
392 thermoregulation of the hive during summer and winter and heat production of members of  
393 different bee castes. *J. Comp. Physiol. B* **159**, 551–560. (doi:10.1007/BF00694379)
- 394 19. Starks PT, Blackie CA, Seeley TD. 2000 Fever in honeybee colonies. *Naturwissenschaften* **87**, 229–  
395 231. (doi:10.1007/s001140050709)
- 396 20. Martín-Hernández R, Meana A, García-Palencia P, Marín P, Botías C, Garrido-Bailón E, Barrios L,  
397 Higes M. 2009 Effect of temperature on the biotic potential of honeybee microsporidia. *Appl.*  
398 *Environ. Microbiol.* **75**, 2554–2557. (doi:10.1128/AEM.02908-08)
- 399 21. Zheng H, Powell JE, Steele MI, Dietrich C, Moran NA. 2017 Honeybee gut microbiota promotes host  
400 weight gain via bacterial metabolism and hormonal signaling. *Proc. Natl. Acad. Sci.* **114**, 4775–4780.  
401 (doi:10.1073/pnas.1701819114)
- 402 22. Zheng H, Perreau J, Powell JE, Han B, Zhang Z, Kwong WK, Tringe SG, Moran NA. 2019 Division of  
403 labor in honey bee gut microbiota for plant polysaccharide digestion. *Proc. Natl. Acad. Sci.* **116**,  
404 25909–25916. (doi:10.1073/pnas.1916224116)
- 405 23. Corena M del P, VanEkeris L, Salazar MI, Bowers D, Fiedler MM, Silverman D, Tu C, Linser PJ. 2005  
406 Carbonic anhydrase in the adult mosquito midgut. *J. Exp. Biol.* **208**, 3263–3273.  
407 (doi:10.1242/jeb.01739)
- 408 24. Šustr V, Stingl U, Brune A. 2014 Microprofiles of oxygen, redox potential, and pH, and microbial  
409 fermentation products in the highly alkaline gut of the saprophagous larva of *Penthetria holosericea*  
410 (Diptera: Bibionidae). *J. Insect Physiol.* **67**, 64–69. (doi:10.1016/j.jinsphys.2014.06.007)
- 411 25. Dadd RH. 1975 Alkalinity within the midgut of mosquito larvae with alkaline-active digestive  
412 enzymes. *J. Insect Physiol.* **21**, 1847–1853. (doi:10.1016/0022-1910(75)90252-8)
- 413 26. Palmer-Young EC, Raffel TR, McFrederick Quinn S. 2018 Temperature-mediated inhibition of a  
414 bumblebee parasite by an intestinal symbiont. *Proc. R. Soc. B Biol. Sci.* **285**, 20182041.  
415 (doi:10.1098/rspb.2018.2041)
- 416 27. Palmer-Young EC, Raffel TR, McFrederick QS. 2019 pH-mediated inhibition of a bumble bee parasite  
417 by an intestinal symbiont. *Parasitology* **146**, 380–388. (doi:10.1017/S0031182018001555)
- 418 28. Wallace FG. 1943 Flagellate Parasites of Mosquitoes with Special Reference to *Crithidia fasciculata*  
419 Léger, 1902. *J. Parasitol.* **29**, 196–205. (doi:10.2307/3273098)

- 420 29. Langridge DF, McGhee RB. 1967 *Crithidia mellifica* n. sp. an acidophilic trypanosomatid of the  
421 honey bee *Apis mellifera*. *J. Protozool.* **14**, 485–487. (doi:10.1111/j.1550-7408.1967.tb02033.x)
- 422 30. Schwarz RS, Bauchan GR, Murphy CA, Ravoet J, de Graaf DC, Evans JD. 2015 Characterization of Two  
423 Species of Trypanosomatidae from the Honey Bee *Apis mellifera*: *Crithidia mellifica* Langridge and  
424 McGhee, and *Lotmaria passim* n. gen., n. sp. *J. Eukaryot. Microbiol.* **62**, 567–583.  
425 (doi:10.1111/jeu.12209)
- 426 31. Cornman RS, Tarpay DR, Chen Y, Jeffreys L, Lopez D, Pettis JS, vanEngelsdorp D, Evans JD. 2012  
427 Pathogen Webs in Collapsing Honey Bee Colonies. *PLOS ONE* **7**, e43562.  
428 (doi:10.1371/journal.pone.0043562)
- 429 32. Ravoet J, Maharramov J, Meeus I, De Smet L, Wenseleers T, Smagghe G, de Graaf DC. 2013  
430 Comprehensive bee pathogen screening in Belgium reveals *Crithidia mellifica* as a new  
431 contributory factor to winter mortality. *PLOS ONE* **8**, e72443.
- 432 33. Arismendi N, Bruna A, Zapata N, Vargas M. 2016 PCR-specific detection of recently described  
433 *Lotmaria passim* (Trypanosomatidae) in Chilean apiaries. *J. Invertebr. Pathol.* **134**, 1–5.  
434 (doi:10.1016/j.jip.2015.12.008)
- 435 34. Morimoto T, Kojima Y, Yoshiyama M, Kimura K, Yang B, Peng G, Kadowaki T. 2013 Molecular  
436 detection of protozoan parasites infecting *Apis mellifera* colonies in Japan. *Environ. Microbiol. Rep.*  
437 **5**, 74–77. (doi:https://doi.org/10.1111/j.1758-2229.2012.00385.x)
- 438 35. Waters TL. 2018 The distribution and population dynamics of the honey bee pathogens *Crithidia*  
439 *mellifica* and *Lotmaria passim* in New Zealand.
- 440 36. Lipa J, Triggiani O. 1988 *Crithidia bombi* sp. n. a flagellated parasite of a bumble-bee *Bombus*  
441 *terrestris* L. (Hymenoptera, Apidae). *Acta Protozool.* **27**, 287–290.
- 442 37. Rademacher E, Harz M, Schneider S. 2017 Effects of Oxalic Acid on *Apis mellifera* (Hymenoptera:  
443 Apidae). *Insects* **8**, 84. (doi:10.3390/insects8030084)
- 444 38. Weidenmüller A, Kleineidam C, Tautz J. 2002 Collective control of nest climate parameters in  
445 bumblebee colonies. *Anim. Behav.* **63**, 1065–1071. (doi:10.1006/anbe.2002.3020)
- 446 39. Filosa JN *et al.* 2019 Dramatic changes in gene expression in different forms of *Crithidia fasciculata*  
447 reveal potential mechanisms for insect-specific adhesion in kinetoplastid parasites. *PLoS Negl. Trop.*  
448 *Dis.* **13**, e0007570. (doi:10.1371/journal.pntd.0007570)
- 449 40. Salathé R, Tognazzo M, Schmid-Hempel R, Schmid-Hempel P. 2012 Probing mixed-genotype  
450 infections I: Extraction and cloning of infections from hosts of the trypanosomatid *Crithidia bombi*.  
451 *PLOS ONE* **7**, e49046. (doi:10.1371/journal.pone.0049046)
- 452 41. Harrison JF, Fewell JH. 2002 Environmental and genetic influences on flight metabolic rate in the  
453 honey bee, *Apis mellifera*. *Comp. Biochem. Physiol. A. Mol. Integr. Physiol.* **133**, 323–333.  
454 (doi:10.1016/S1095-6433(02)00163-0)

- 455 42. R Core Team. 2014 *R: A language and environment for statistical computing*. Vienna, Austria: R  
456 Foundation for Statistical Computing. See <http://www.R-project.org>.
- 457 43. Padfield D, O’Sullivan H, Pawar S. 2021 rTPC and nls.multstart: A new pipeline to fit thermal  
458 performance curves in r. *Methods Ecol. Evol.* **n/a**. (doi:<https://doi.org/10.1111/2041-210X.13585>)
- 459 44. Wickham H. 2009 *ggplot2: elegant graphics for data analysis*. Springer New York. See  
460 <http://had.co.nz/ggplot2/book>.
- 461 45. Wilke CO. 2016 cowplot: streamlined plot theme and plot annotations for ‘ggplot2’. *CRAN Repos.*  
462 (doi:<https://CRAN.R-project.org/package=cowplot>)
- 463 46. Padfield D, Castledine M, Buckling A. 2020 Temperature-dependent changes to host–parasite  
464 interactions alter the thermal performance of a bacterial host. *ISME J.* **14**, 389–398.  
465 (doi:[10.1038/s41396-019-0526-5](https://doi.org/10.1038/s41396-019-0526-5))
- 466 47. Molnár PK, Sckrabulis JP, Altman KA, Raffel TR. 2017 Thermal Performance Curves and the  
467 Metabolic Theory of Ecology—A Practical Guide to Models and Experiments for Parasitologists. *J.*  
468 *Parasitol.* **103**, 423–439. (doi:[10.1645/16-148](https://doi.org/10.1645/16-148))
- 469 48. Padfield D, Yvon-Durocher G, Buckling A, Jennings S, Yvon-Durocher G. 2016 Rapid evolution of  
470 metabolic traits explains thermal adaptation in phytoplankton. *Ecol. Lett.* **19**, 133–142.  
471 (doi:[10.1111/ele.12545](https://doi.org/10.1111/ele.12545))
- 472 49. Schoolfield RM, Sharpe PJH, Magnuson CE. 1981 Non-linear regression of biological temperature-  
473 dependent rate models based on absolute reaction-rate theory. *J. Theor. Biol.* **88**, 719–731.  
474 (doi:[10.1016/0022-5193\(81\)90246-0](https://doi.org/10.1016/0022-5193(81)90246-0))
- 475 50. Fox J, Weisberg S. 2011 *An R companion to applied regression*. Second Ed. Thousand Oaks CA: Sage.  
476 See <http://socserv.socsci.mcmaster.ca/jfox/Books/Companion>.
- 477 51. Mordecai EA *et al.* 2019 Thermal biology of mosquito-borne disease. *Ecol. Lett.* **22**, 1690–1708.  
478 (doi:<https://doi.org/10.1111/ele.13335>)
- 479 52. Dell AI, Pawar S, Savage VM. 2011 Systematic variation in the temperature dependence of  
480 physiological and ecological traits. *Proc. Natl. Acad. Sci.* **108**, 10591–10596.  
481 (doi:[10.1073/pnas.1015178108](https://doi.org/10.1073/pnas.1015178108))
- 482 53. Ishemgulova A *et al.* 2017 Molecular mechanisms of thermal resistance of the insect  
483 trypanosomatid *Crithidia thermophila*. *PLOS ONE* **12**, e0174165.  
484 (doi:[10.1371/journal.pone.0174165](https://doi.org/10.1371/journal.pone.0174165))
- 485 54. Roitman I, Mundim MH, Azevedo HPD, Kitajima EW. 1977 Growth of *Crithidia* at High Temperature:  
486 *Crithidia hutneri* sp. n. and *Crithidia luciliae thermophila* s. sp. n.\*. *J. Protozool.* **24**, 553–556.  
487 (doi:<https://doi.org/10.1111/j.1550-7408.1977.tb01013.x>)
- 488 55. Roitman I, Brener Z, Roitman C, Kitajima EW. 1976 Demonstration that *Leptomonas pessoai* Galvão,  
489 Oliveira, Carvalho & Veiga, 1970, is a *Herpetomonas*\*. *J. Protozool.* **23**, 291–293.  
490 (doi:[10.1111/j.1550-7408.1976.tb03773.x](https://doi.org/10.1111/j.1550-7408.1976.tb03773.x))

- 491 56. Roitman C, Roitman I, Azevedo HP de. 1972 Growth of an Insect Trypanosomatid at 37 C in a  
492 Defined Medium\*. *J. Protozool.* **19**, 346–349. (doi:<https://doi.org/10.1111/j.1550-7408.1972.tb03473.x>)  
493
- 494 57. Ahuja K, Arora G, Khare P, Selvapandiyan A. 2015 Selective elimination of Leptomonas from the in  
495 vitro co-culture with Leishmania. *Parasitol. Int.* **64**, 1–5. (doi:[10.1016/j.parint.2015.01.003](https://doi.org/10.1016/j.parint.2015.01.003))
- 496 58. McGhee RB, Cosgrove WB. 1980 Biology and physiology of the lower Trypanosomatidae. *Microbiol.*  
497 *Rev.* **44**, 140–173.
- 498 59. Schmittner SM, McGhee RB. 1970 Host Specificity of Various Species of Crithidia Léger. *J. Parasitol.*  
499 **56**, 684–693. (doi:[10.2307/3277713](https://doi.org/10.2307/3277713))
- 500 60. Hanson WL, McGHEE RB. 1961 The Biology and Morphology of Crithidia acanthocephali n. sp.,  
501 Leptomonas leptoglossi n. sp., and Blastocrithidia euschisti n. sp.\*. *J. Protozool.* **8**, 200–204.  
502 (doi:[10.1111/j.1550-7408.1961.tb01204.x](https://doi.org/10.1111/j.1550-7408.1961.tb01204.x))
- 503 61. Bartolomé C, Buendía-Abad M, Benito M, Sobrino B, Amigo J, Carracedo A, Martín-Hernández R,  
504 Higes M, Maside X. 2020 Longitudinal analysis on parasite diversity in honeybee colonies: new taxa,  
505 high frequency of mixed infections and seasonal patterns of variation. *Sci. Rep.* **10**, 10454.  
506 (doi:[10.1038/s41598-020-67183-3](https://doi.org/10.1038/s41598-020-67183-3))
- 507 62. Gilmour KM, Ellington CP. 1993 Power Output of Glycerinated Bumblebee Flight Muscle. *J. Exp. Biol.*  
508 **183**, 77–100.
- 509 63. Kammer AE, Heinrich B. 1974 Metabolic Rates Related to Muscle Activity in Bumblebees. *J. Exp. Biol.*  
510 **61**, 219–227.
- 511 64. Koch H, Schmid-Hempel P. 2011 Socially transmitted gut microbiota protect bumble bees against an  
512 intestinal parasite. *Proc. Natl. Acad. Sci. U. S. A.* **108**, 19288–19292. (doi:[10.1073/pnas.1110474108](https://doi.org/10.1073/pnas.1110474108))
- 513 65. Engel P, James RR, Koga R, Kwong WK, McFrederick QS, Moran NA. 2013 Standard methods for  
514 research on *Apis mellifera* gut symbionts. *J. Apic. Res.* **52**, 1–24. (doi:[10.3896/IBRA.1.52.4.07](https://doi.org/10.3896/IBRA.1.52.4.07))
- 515 66. Hammer TJ, Le E, Moran NA. 2021 Thermal niches of specialized gut symbionts: the case of social  
516 bees. *Proc. R. Soc. B Biol. Sci.* **288**, 20201480. (doi:[10.1098/rspb.2020.1480](https://doi.org/10.1098/rspb.2020.1480))
- 517 67. Palmer-Young EC, Ngor L, Nevarez RB, Rothman JA, Raffel TR, McFrederick QS. 2019 Temperature  
518 dependence of parasitic infection and gut bacterial communities in bumble bees. *Environ. Microbiol.*  
519 **21**, 4706–4723. (doi:[10.1111/1462-2920.14805](https://doi.org/10.1111/1462-2920.14805))
- 520 68. Seeley TD. 1982 Adaptive Significance of the Age Polyethism Schedule in Honeybee Colonies. *Behav.*  
521 *Ecol. Sociobiol.* **11**, 287–293.
- 522 69. Liu Q, Lei J, Darby AC, Kadowaki T. 2020 Trypanosomatid parasite dynamically changes the  
523 transcriptome during infection and modifies honey bee physiology. *Commun. Biol.* **3**, 1–8.  
524 (doi:[10.1038/s42003-020-0775-x](https://doi.org/10.1038/s42003-020-0775-x))

- 525 70. Vejnovic B, Stevanovic J, Schwarz RS, Aleksic N, Mirilovic M, Jovanovic NM, Stanimirovic Z. 2018  
526 Quantitative PCR assessment of *Lotmaria passim* in *Apis mellifera* colonies co-infected naturally  
527 with *Nosema ceranae*. *J. Invertebr. Pathol.* **151**, 76–81. (doi:10.1016/j.jip.2017.11.003)
- 528 71. Runckel C, Flenniken ML, Engel JC, Ruby JG, Ganem D, Andino R, DeRisi JL. 2011 Temporal analysis of  
529 the honey bee microbiome reveals four novel viruses and seasonal prevalence of known viruses,  
530 *Nosema*, and *Crithidia*. *PLOS ONE* **6**, e20656. (doi:10.1371/journal.pone.0020656)
- 531 72. Esch H. 1960 Über die Körpertemperaturen und den Wärmehaushalt von *Apis mellifica*. *Z. Für Vgl.*  
532 *Physiol.* **43**, 305–335. (doi:10.1007/BF00298066)
- 533 73. Meikle WG, Adamczyk JJ, Weiss M, Gregorc A. 2018 Effects of bee density and sublethal  
534 imidacloprid exposure on cluster temperatures of caged honey bees. *Apidologie* **49**, 581–593.  
535 (doi:10.1007/s13592-018-0585-z)
- 536 74. Meikle WG, Weiss M, Maes PW, Fitz W, Snyder LA, Sheehan T, Mott BM, Anderson KE. 2017 Internal  
537 hive temperature as a means of monitoring honey bee colony health in a migratory beekeeping  
538 operation before and during winter. *Apidologie* **48**, 666–680. (doi:10.1007/s13592-017-0512-8)
- 539 75. Kraus B, Velthuis HHW, Tingek S. 1998 Temperature profiles of the brood nests of *Apis cerana* and  
540 *Apis mellifera* colonies and their relation to varroosis. *J. Apic. Res.* **37**, 175–181.  
541 (doi:10.1080/00218839.1998.11100969)
- 542 76. Mardan M, Kevan PG. 1989 Honeybees and ‘yellow rain’. *Nature* **341**, 191–191.  
543 (doi:10.1038/341191a0)
- 544 77. Yang B, Peng G, Li T, Kadowaki T. 2013 Molecular and phylogenetic characterization of honey bee  
545 viruses, *Nosema* microsporidia, protozoan parasites, and parasitic mites in China. *Ecol. Evol.* **3**, 298–  
546 311. (doi:https://doi.org/10.1002/ece3.464)
- 547 78. Klee J *et al.* 2007 Widespread dispersal of the microsporidian *Nosema ceranae*, an emergent  
548 pathogen of the western honey bee, *Apis mellifera*. *J. Invertebr. Pathol.* **96**, 1–10.  
549 (doi:10.1016/j.jip.2007.02.014)
- 550 79. Newmark HL, Lupton JR. 1990 Determinants and consequences of colonic luminal pH: Implications  
551 for colon cancer. *Nutr. Cancer* **14**, 161–173. (doi:10.1080/01635589009514091)
- 552 80. Zimmer J, Lange B, Frick J-S, Sauer H, Zimmermann K, Schwiertz A, Rusch K, Klosterhalfen S, Enck P.  
553 2012 A vegan or vegetarian diet substantially alters the human colonic faecal microbiota. *Eur. J. Clin.*  
554 *Nutr.* **66**, 53–60. (doi:10.1038/ejcn.2011.141)
- 555 81. McGhee RB, Hanson WL, Schmittner SM. 1969 Isolation, Cloning and Determination of Biologic  
556 Characteristics of Five New Species of *Crithidia*. *J. Protozool.* **16**, 514–520. (doi:10.1111/j.1550-  
557 7408.1969.tb02310.x)
- 558 82. Bongers J. 1970 Die Carbohydrasen und Esterasen in Speicheldrüsen und Mitteldarm von  
559 *Oncopeltus fasciatus* Dall. (Heteroptera: Lygaeidae). *Z. Für Vgl. Physiol.* **70**, 382–400.  
560 (doi:10.1007/BF00298193)

- 561 83. Nepomuceno DB, Santos VC, Araújo RN, Pereira MH, Sant'Anna MR, Moreira LA, Gontijo NF. 2017  
562 pH control in the midgut of *Aedes aegypti* under different nutritional conditions. *J. Exp. Biol.* **220**,  
563 3355–3362. (doi:10.1242/jeb.158956)
- 564 84. Kidder GW, Dutta BN. 1958 The Growth and Nutrition of *Crithidia fasciculata*. *Microbiology*, **18**,  
565 621–638. (doi:10.1099/00221287-18-3-621)
- 566 85. Kwong WK, Medina LA, Koch H, Sing K-W, Soh EY, Ascher JS, Jaffé R, Moran NA. 2017 Dynamic  
567 microbiome evolution in social bees. *Sci. Adv.* **3**, e1600513. (doi:10.1126/sciadv.1600513)
- 568 86. Gisder S, Horchler L, Pieper F, Schüller V, Šima P, Genersch E. 2020 Rapid Gastrointestinal Passage  
569 May Protect *Bombus terrestris* from Becoming a True Host for *Nosema ceranae*. *Appl. Environ.*  
570 *Microbiol.* **86**. (doi:10.1128/AEM.00629-20)
- 571 87. Ruiz-González MX, Brown MJF. 2006 Honey bee and bumblebee trypanosomatids: specificity and  
572 potential for transmission. *Ecol. Entomol.* **31**, 616–622. (doi:10.1111/j.1365-2311.2006.00823.x)
- 573 88. Omholt SW. 1987 Why honeybees rear brood in winter. A theoretical study of the water conditions  
574 in the winter cluster of the honeybee, *Apis mellifera*. *J. Theor. Biol.* **128**, 329–337.  
575 (doi:10.1016/S0022-5193(87)80075-9)
- 576 89. Kešnerová L, Emery O, Troilo M, Liberti J, Erkosar B, Engel P. 2020 Gut microbiota structure differs  
577 between honeybees in winter and summer. *ISME J.* **14**, 801–814. (doi:10.1038/s41396-019-0568-8)
- 578 90. Jansen AM, Carreira JC, Deane MP. 1988 Infection of a mammal by monogenetic insect  
579 trypanosomatids (Kinetoplastida, trypanosomatidae). *Mem. Inst. Oswaldo Cruz* **83**, 271–272.  
580 (doi:10.1590/S0074-02761988000300001)
- 581 91. Rangel DA, Lisboa CV, Novaes RLM, Silva BA, Souza R de F, Jansen AM, Moratelli R, Roque ALR. 2019  
582 Isolation and characterization of trypanosomatids, including *Crithidia mellificae*, in bats from the  
583 Atlantic Forest of Rio de Janeiro, Brazil. *PLoS Negl. Trop. Dis.* **13**, e0007527.  
584 (doi:10.1371/journal.pntd.0007527)
- 585 92. Dario MA, Lisboa CV, Silva MV, Herrera HM, Rocha FL, Furtado MC, Moratelli R, Rodrigues Roque AL,  
586 Jansen AM. 2021 *Crithidia mellificae* infection in different mammalian species in Brazil. *Int. J.*  
587 *Parasitol. Parasites Wildl.* **15**, 58–69. (doi:10.1016/j.ijppaw.2021.04.003)
- 588 93. Ngor L, Palmer-Young EC, Nevarez RB, Russell KA, Leger L, Giacomini SJ, Pinilla-Gallego MS, Irwin RE,  
589 McFrederick QS. 2020 Cross-infectivity of honey and bumble bee-associated parasites across three  
590 bee families. *Parasitology* **147**, 1290–1304. (doi:10.1017/S0031182020001018)
- 591 94. Lom J. 1964 The occurrence of a *Crithidia* species within the gut of the honey-bee, *Apis mellifica* L. In  
592 *Entomophaga, Mémoire H; serie 2. Colloque International de Pathologie d'Insectes*, pp. 91–93.
- 593

594 **FIGURES**

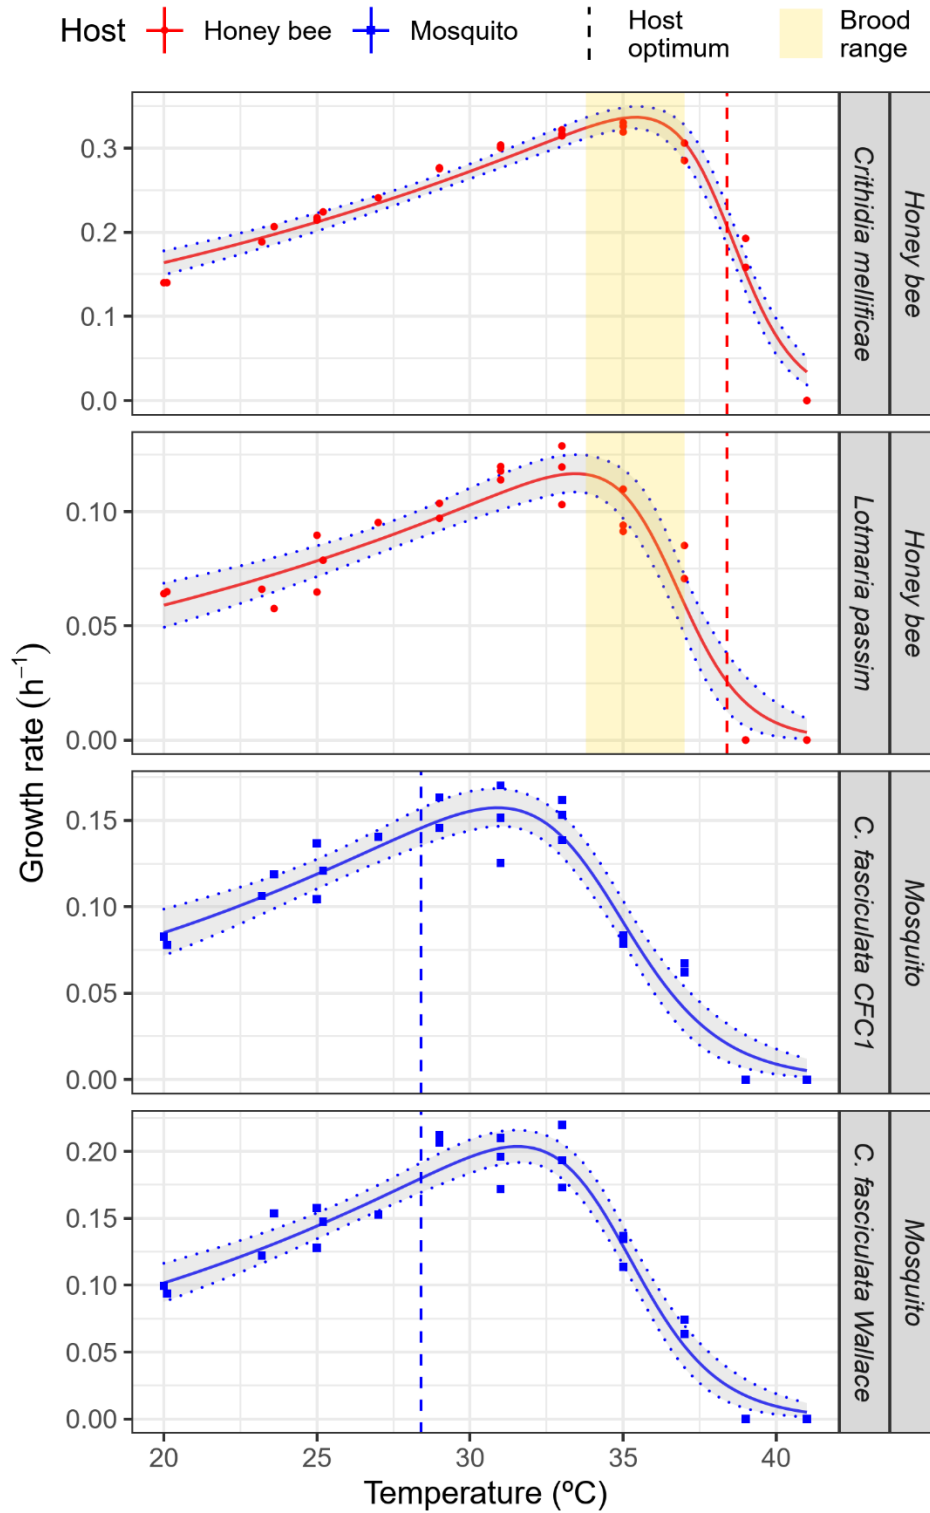



596

597 **Figure 1. Thermal performance curves for trypanosomatid parasites from honey bees (*Crithidia***

598 ***mellificae*, *Lotmaria passim*) and mosquitoes (*Crithidia fasciculata*).** The right-most facet label indicates

599 the strain's host of origin. Each point represents the median specific growth rate ( $h^{-1}$ ) from one 15-

600 replicate experiment, with color and shape corresponding to the parasite's host. Lines and shaded bands

601 show predictions and 95% bootstrap confidence intervals from Sharpe-Schoolfield models [43,49].

602 Vertical lines show optimum temperatures for honey bees (estimated from force production during

603 flight [41]) and mosquitoes (mean of 88 traits [51]). Vertical band (in yellow) shows temperature range

604 for honey bee brood incubation [18]. See Supplementary Figure 1 for full thermal performance curve of

605 honey bee force production.

606

607

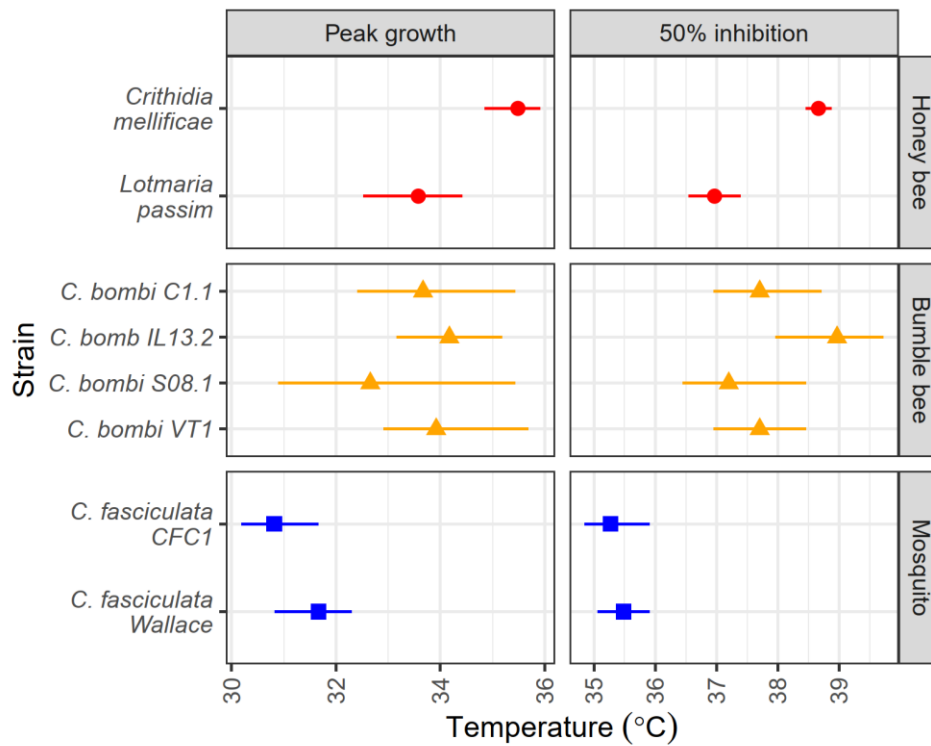

608

609 **Figure 2. Temperatures of peak growth and 50% inhibition of growth rate** for parasites of honey bees

610 (*Crithidia mellifica*, *Lotmaria passim*), bumble bees (*C. bombi*, tested in [26]), and mosquitoes (*C.*

611 *fasciculata*). Points and error bars show estimates and 95% bootstrap confidence intervals for

612 predictions from Sharpe-Schoolfield models. See Supplementary Figure 2 for full thermal performance

613 curves for *C. bombi*. Estimates for additional model parameters are shown in Supplementary Figure 3.

614

615

616

617

618

619

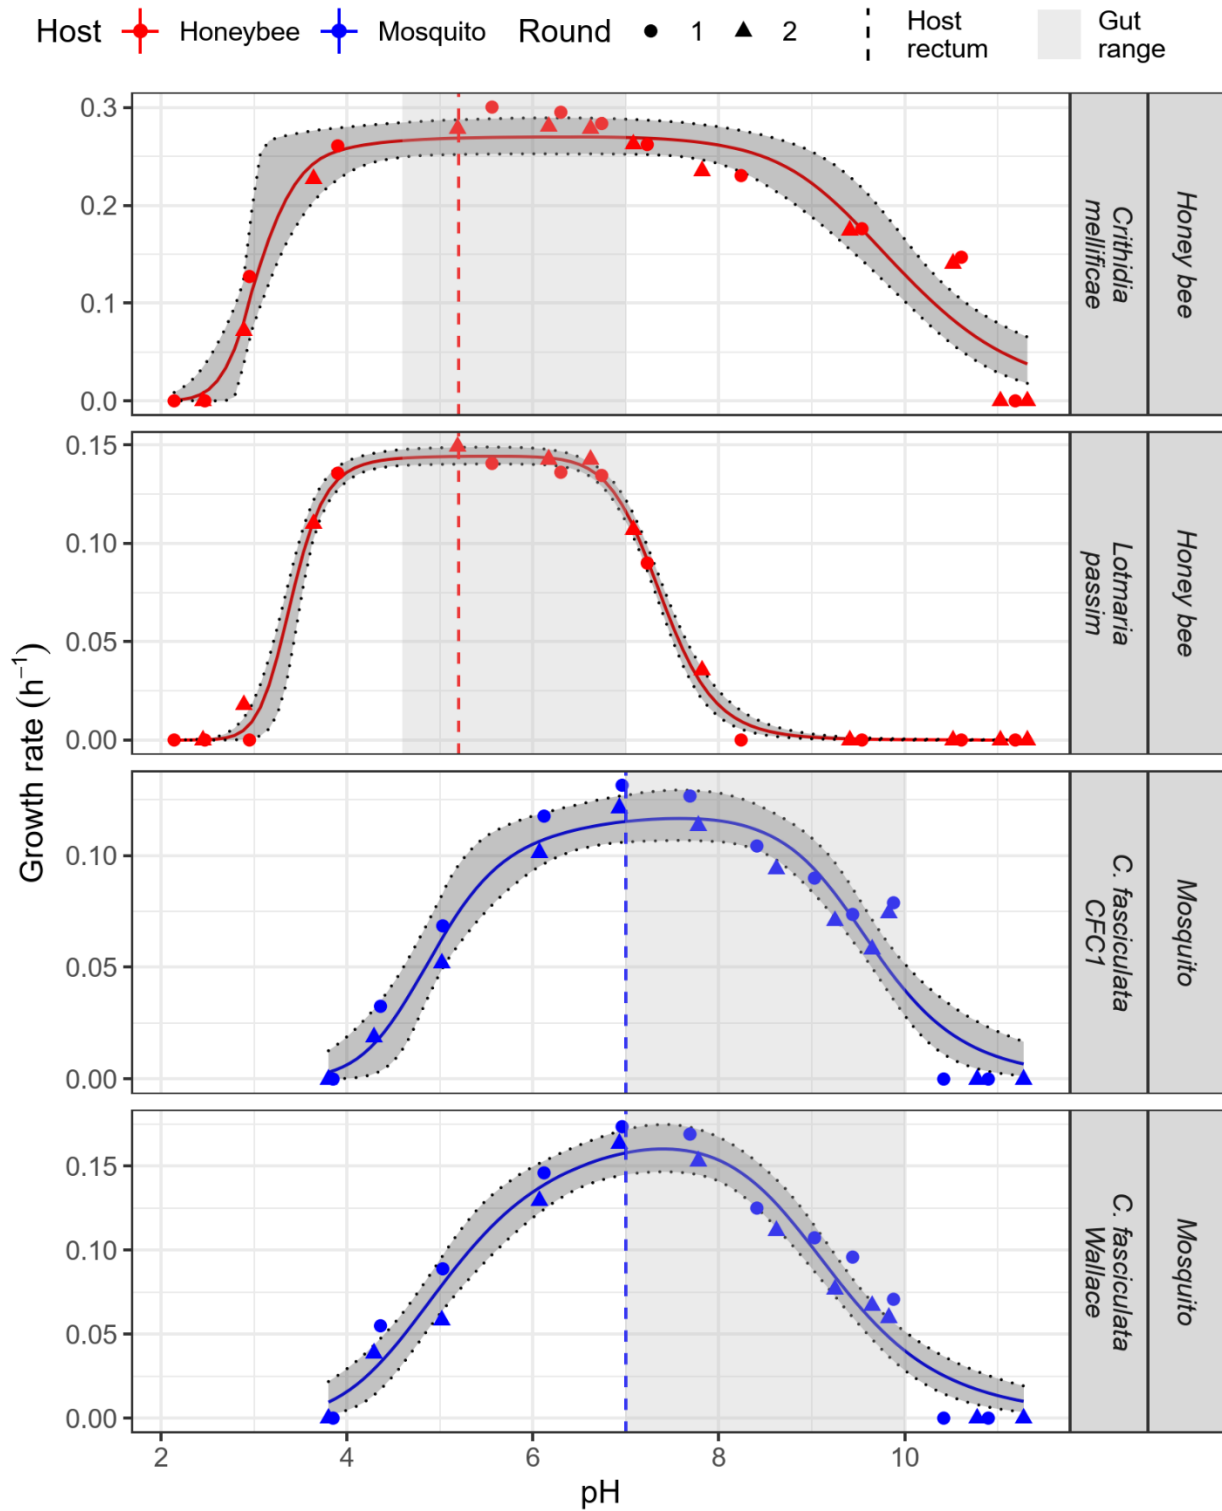

620

621 **Figure 3. Effects of pH on growth of trypanosomatid parasites from honey bees (*Crithidia mellifica*,**

622 *Lotmaria passim*) and mosquitoes (*Crithidia fasciculata*). The right-most facet label indicates the strain's

623 host of origin. Each point represents the specific growth rate ( $h^{-1}$ ) from one sample. The experiment  
624 was conducted over two experimental blocks (Round 1: circles; Round 2: triangles). Lines and shaded  
625 bands show predictions and 95% bootstrap confidence intervals from biphasic logistic models. Vertical  
626 lines and shaded regions show pH of the rectum (primary site of parasite infection) and range of the gut  
627 overall, as measured previously in honey bees [21,37] and *Culex* mosquitoes [25].

628

629

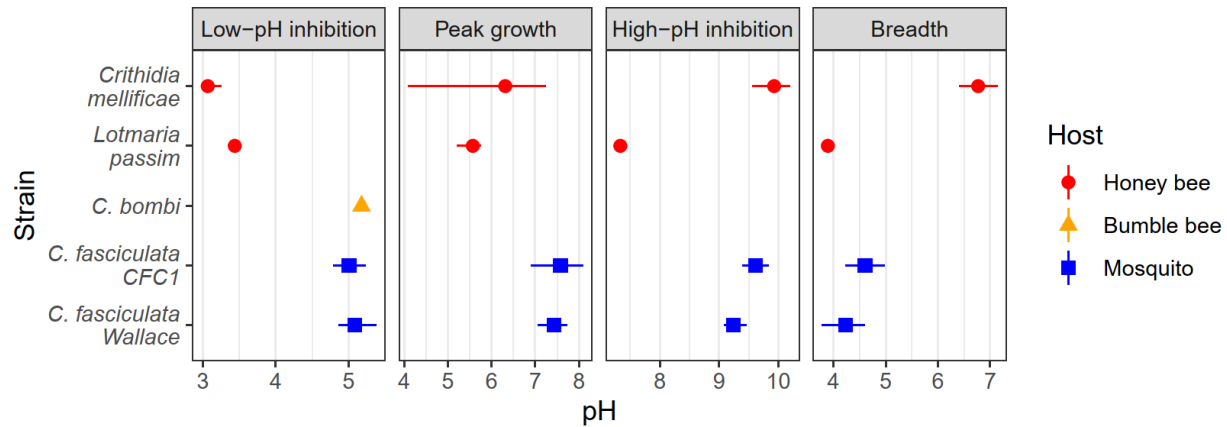

630

631 **Figure 4. Estimates for pH of peak growth, 50% inhibition of growth rate due to low and high pH, and**

632 **pH niche breadth** (i.e., difference between estimates of 50% inhibition due to low and high pH) for

633 parasites of honey bees (*Crithidia mellifica*, *Lotmaria passim*), bumble bees (*C. bombi* strain IL13.2,

634 tested in [27]), and mosquitoes (*C. fasciculata*). Points and error bars show estimates and 95% bootstrap

635 confidence intervals for predictions from biphasic logistic models. Colors and shapes correspond to host

636 of origin. See Supplementary Figure 4 for full model predictions for *C. bombi*. Estimates for additional

637 model parameters are shown in Supplementary Figure 5.

638

639

640 **MEDIA PROMOTION**

641 High body temperature and acidic gut pH are two factors that inhibit parasitic infection. The high colony  
642 temperatures and acidic guts of social bees relative to other insects provide unique opportunities to test  
643 how temperature and acidity shape insect-parasite associations and potential for spillover into warm-  
644 blooded mammals. We show that parasites of honey bees have greater tolerance of heat and acidity  
645 than do related parasites of mosquitoes, which lack both temperature regulation and gut acidity. This  
646 suggests that honey bees' colony-enabled temperature regulation and gut chemistry provide resistance  
647 to non-specialist parasites, favoring the same parasite traits needed for mammalian infection.

648
